# Supplementary material for: Formalin Fixation at Low Temperature Better Preserves Nucleic Acid Integrity
Source: PLOS journal article supplement (doi:10.1371/journal.pone.0021043), 2011-06-15

**Figure S2: Probe detection analysis on cancer samples subdivided by tissue of origin.**

**(a)** Four CRCs; **(b)** Four breast cancers; **(c)** One pancreatic and one stomach cancer. For all CRC samples, a replicate cold fixation was performed and RNA was extracted, to assess consistency of the procedure on the same tissue sample.

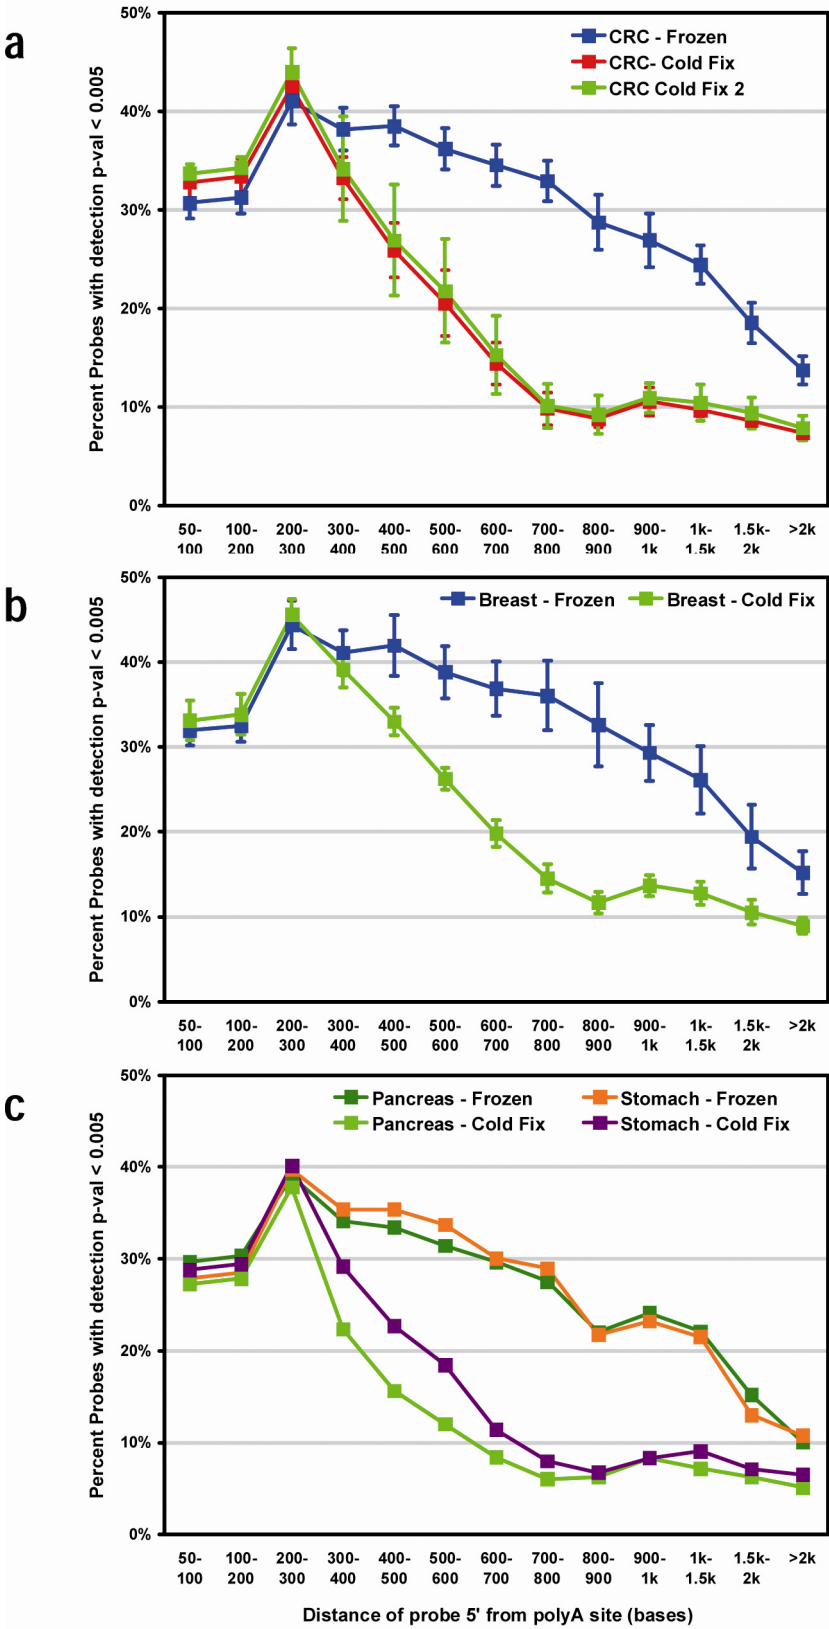

Supplement: S2 (10.1371/journal.pone.0021043.s002) [file journal.pone.0021043.s002]
