# Supplementary material for: Formalin Fixation at Low Temperature Better Preserves Nucleic Acid Integrity
Source: PLOS journal article supplement (doi:10.1371/journal.pone.0021043), 2011-06-15

**Figure S3: Cold-fixed samples generate reproducible expression profiles, highly correlated with those generated by frozen samples.**

**(a)** Pearson correlation between frozen (F) and Cold-Fixed (CF) or Standard-Fixed (SF) samples, plus correlation between replicate samples from the same cold-fixed tissue. **(b-e)** Dot plots comparing, expression profiles of RNA from, respectively: frozen vs standard-fixed tissue **(b)**, Frozen vs Cold-Fixed tissue of a representative CRC sample **(c)**, frozen vs Cold-Fixed tissue of a representative breast cancer sample **(d)**, Cold-fixed vs replicate sample extracted from the same cold-fixed tissue **(e)**.

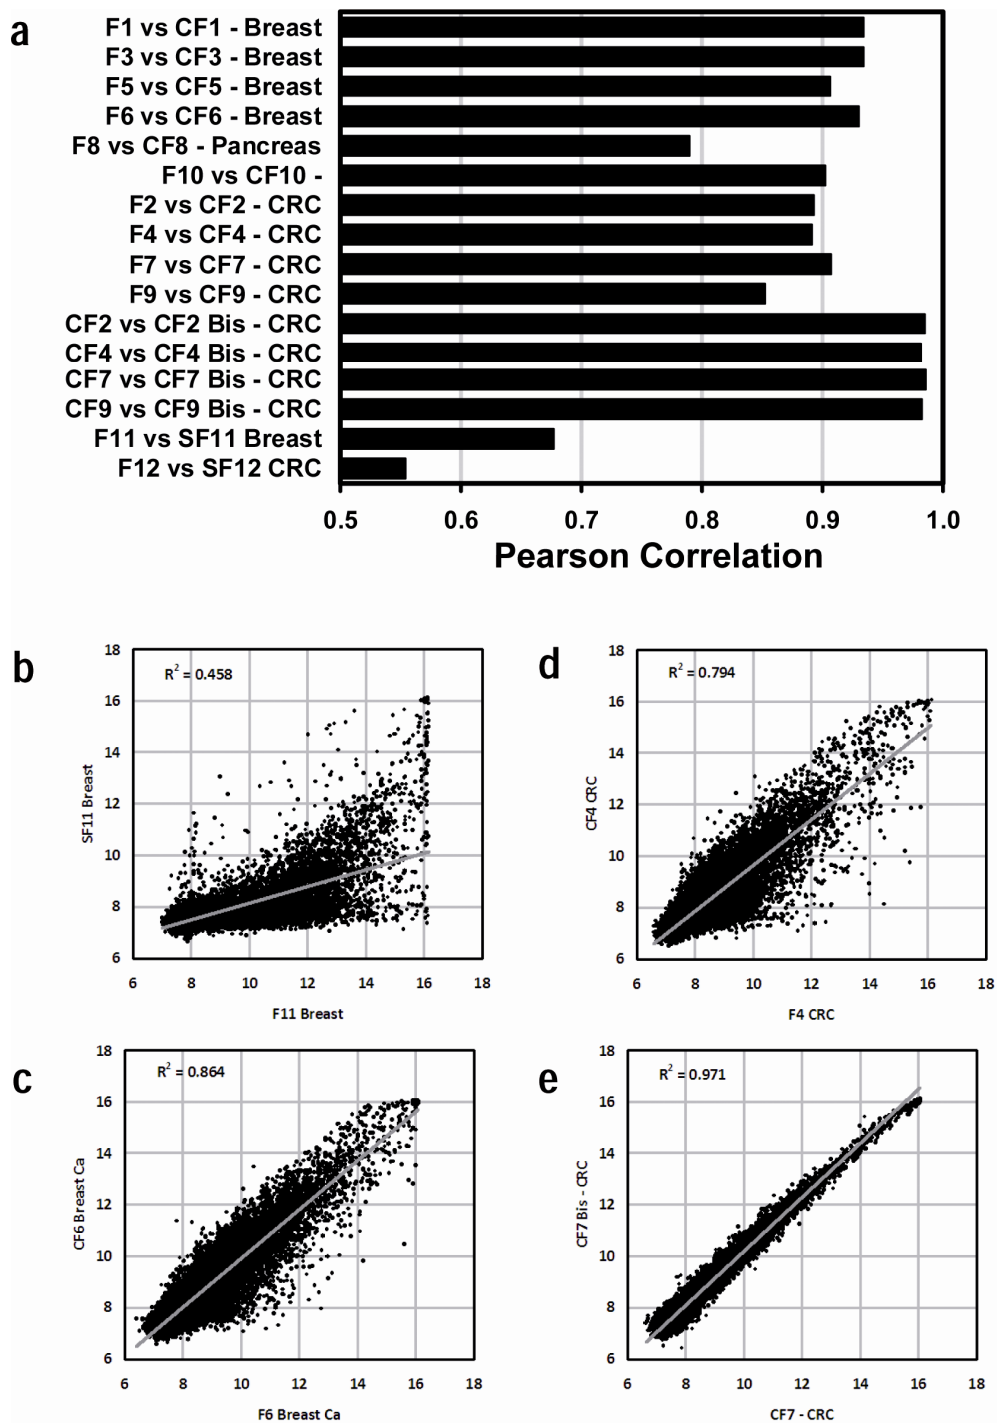

Supplement: S3 (10.1371/journal.pone.0021043.s003) [file journal.pone.0021043.s003]
