# Supplementary material for: Formalin Fixation at Low Temperature Better Preserves Nucleic Acid Integrity
Source: PLOS journal article supplement (doi:10.1371/journal.pone.0021043), 2011-06-15

**Figure S4: RNA from cold-fixed samples generates reliable expression profiles also with probes far away from the Reverse Transcription start site.**

Pearson correlation was analyzed for subgroups of microarray probes, based on their distance from the transcript 3'-end. **(a)** Breast Cancer samples; **(b)** CRC samples; **(c)** Pancreas and stomach cancer; **(d)** CRC replicated cold-fixed samples.

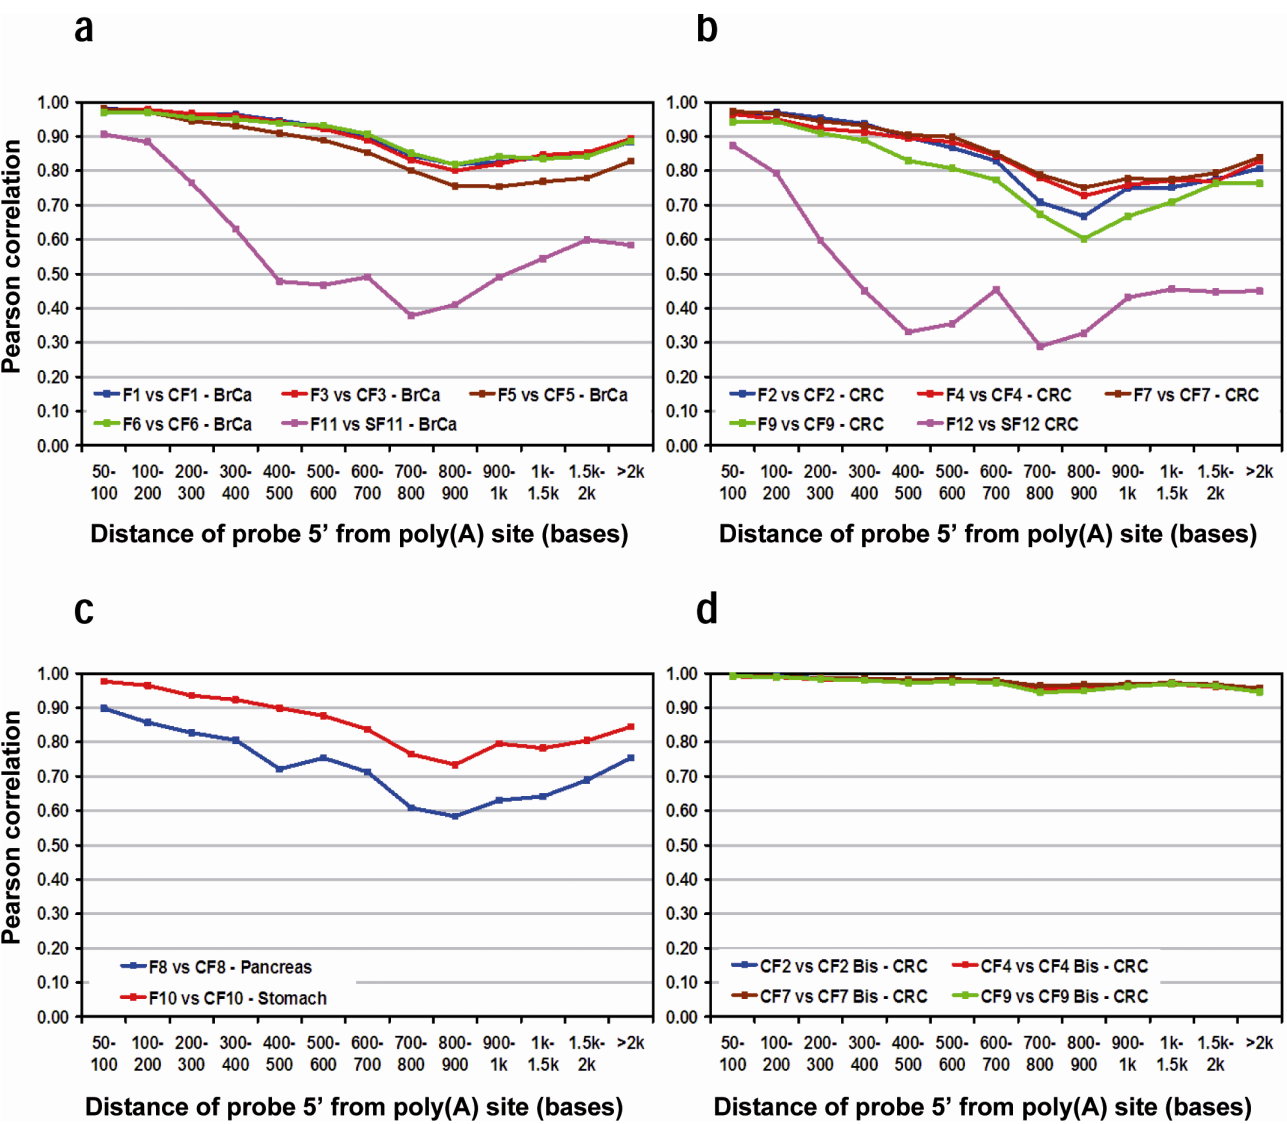

Supplement: S4 (10.1371/journal.pone.0021043.s004) [file journal.pone.0021043.s004]
